# Supplementary material
Source: publisher figshare collection journal article supplement (https://acs.figshare.com/ndownloader/files/4185592)
Supplement: Supplementary file 1 [file 4185592]

 
data_whole
 
_audit_creation_method            SHELXL-97
_chemical_name_systematic
;
 ?
;
_chemical_name_common             'Theophylline'
_chemical_melting_point           ?
_chemical_formula_moiety          ?
_chemical_formula_sum
 'C7 H8 N4 O2'
_chemical_formula_weight          180.17
 
loop_
 _atom_type_symbol
 _atom_type_description
 _atom_type_scat_dispersion_real
 _atom_type_scat_dispersion_imag
 _atom_type_scat_source
 'C'  'C'   0.0033   0.0016
 'International Tables Vol C Tables 4.2.6.8 and 6.1.1.4'
 'H'  'H'   0.0000   0.0000
 'International Tables Vol C Tables 4.2.6.8 and 6.1.1.4'
 'N'  'N'   0.0061   0.0033
 'International Tables Vol C Tables 4.2.6.8 and 6.1.1.4'
 'O'  'O'   0.0106   0.0060
 'International Tables Vol C Tables 4.2.6.8 and 6.1.1.4'
 
_symmetry_cell_setting            'Orthorhombic'
_symmetry_space_group_name_H-M    'Pna2(1)'
 
loop_
 _symmetry_equiv_pos_as_xyz
 'x, y, z'
 '-x, -y, z+1/2'
 '-x+1/2, y+1/2, z+1/2'
 'x+1/2, -y+1/2, z'
 
_cell_length_a                    13.087(2)
_cell_length_b                    15.579(3)
_cell_length_c                    3.8629(6)
_cell_angle_alpha                 90.00
_cell_angle_beta                  90.00
_cell_angle_gamma                 90.00
_cell_volume                      787.6(2)
_cell_formula_units_Z             4
_cell_measurement_temperature     120(2)
_cell_measurement_reflns_used     1425
_cell_measurement_theta_min       3.04
_cell_measurement_theta_max       26.40
 
_exptl_crystal_description        'Fragment of prism'
_exptl_crystal_colour             'colorless'
_exptl_crystal_size_max           0.2
_exptl_crystal_size_mid           0.2
_exptl_crystal_size_min           0.05
_exptl_crystal_density_meas       ?
_exptl_crystal_density_diffrn     1.520
_exptl_crystal_density_method     'not measured'
_exptl_crystal_F_000              376
_exptl_absorpt_coefficient_mu     0.116
_exptl_absorpt_correction_type    none
_exptl_absorpt_correction_T_min   ?
_exptl_absorpt_correction_T_max   ?
_exptl_absorpt_process_details    ?
 
_exptl_special_details
;
 ?
;
 
_diffrn_ambient_temperature       120(2)
_diffrn_radiation_wavelength      0.71073
_diffrn_radiation_type            MoK\a
_diffrn_radiation_source          'fine-focus sealed tube'
_diffrn_radiation_monochromator   graphite
_diffrn_measurement_device_type   'CCD area detector'
_diffrn_measurement_method        'phi and omega scans'
_diffrn_detector_area_resol_mean  ?
_diffrn_standards_number          ?
_diffrn_standards_interval_count  ?
_diffrn_standards_interval_time   ?
_diffrn_standards_decay_%         ?
_diffrn_reflns_number             6379
_diffrn_reflns_av_R_equivalents   0.1863
_diffrn_reflns_av_sigmaI/netI     0.1330
_diffrn_reflns_limit_h_min        -18
_diffrn_reflns_limit_h_max        18
_diffrn_reflns_limit_k_min        -21
_diffrn_reflns_limit_k_max        14
_diffrn_reflns_limit_l_min        -5
_diffrn_reflns_limit_l_max        5
_diffrn_reflns_theta_min          2.03
_diffrn_reflns_theta_max          29.34
_reflns_number_total              2139
_reflns_number_gt                 1370
_reflns_threshold_expression      >2sigma(I)
 
_computing_data_collection        'Bruker SMART'
_computing_cell_refinement        'Bruker SMART'
_computing_data_reduction         'Bruker SAINT'
_computing_structure_solution     'Bruker SHELXTL'
_computing_structure_refinement   'Bruker SHELXTL'
_computing_molecular_graphics     ?
_computing_publication_material   ?
 
_refine_special_details
;
 Refinement of F^2^ against ALL reflections.  The weighted R-factor wR and
 goodness of fit S are based on F^2^, conventional R-factors R are based
 on F, with F set to zero for negative F^2^. The threshold expression of
 F^2^ > 2sigma(F^2^) is used only for calculating R-factors(gt) etc. and is
 not relevant to the choice of reflections for refinement.  R-factors based
 on F^2^ are statistically about twice as large as those based on F, and R-
 factors based on ALL data will be even larger.
;
 
_refine_ls_structure_factor_coef  Fsqd
_refine_ls_matrix_type            full
_refine_ls_weighting_scheme       calc
_refine_ls_weighting_details
 'calc w=1/[\s^2^(Fo^2^)+(0.1194P)^2^+0.0000P] where P=(Fo^2^+2Fc^2^)/3'
_atom_sites_solution_primary      direct
_atom_sites_solution_secondary    difmap
_atom_sites_solution_hydrogens    geom
_refine_ls_hydrogen_treatment     mixed
_refine_ls_extinction_method      none
_refine_ls_extinction_coef        ?
_refine_ls_abs_structure_details
 'Flack H D (1983), Acta Cryst. A39, 876-881'
_refine_ls_abs_structure_Flack    0(3)
_refine_ls_number_reflns          2139
_refine_ls_number_parameters      124
_refine_ls_number_restraints      1
_refine_ls_R_factor_all           0.1130
_refine_ls_R_factor_gt            0.0786
_refine_ls_wR_factor_ref          0.2118
_refine_ls_wR_factor_gt           0.1934
_refine_ls_goodness_of_fit_ref    0.972
_refine_ls_restrained_S_all       0.971
_refine_ls_shift/su_max           0.001
_refine_ls_shift/su_mean          0.000
 
loop_
 _atom_site_label
 _atom_site_type_symbol
 _atom_site_fract_x
 _atom_site_fract_y
 _atom_site_fract_z
 _atom_site_U_iso_or_equiv
 _atom_site_adp_type
 _atom_site_occupancy
 _atom_site_symmetry_multiplicity
 _atom_site_calc_flag
 _atom_site_refinement_flags
 _atom_site_disorder_assembly
 _atom_site_disorder_group
C1 C 0.9805(3) 0.7303(2) 0.4820(9) 0.0224(7) Uani 1 1 d . . .
O2 O 0.73673(19) 0.8176(2) 0.9924(8) 0.0352(7) Uani 1 1 d . . .
O3 O 1.0342(2) 0.87468(18) 0.4142(7) 0.0313(7) Uani 1 1 d . . .
N4 N 1.0538(2) 0.6790(2) 0.3323(7) 0.0248(7) Uani 1 1 d . . .
N5 N 0.8223(2) 0.7028(2) 0.7751(8) 0.0246(7) Uani 1 1 d . . .
C6 C 0.8102(3) 0.7887(3) 0.8301(9) 0.0251(7) Uani 1 1 d . . .
N7 N 0.9320(2) 0.5913(2) 0.5357(8) 0.0268(7) Uani 1 1 d . . .
C8 C 0.9739(2) 0.8205(2) 0.5205(9) 0.0240(8) Uani 1 1 d . . .
C9 C 0.9086(3) 0.6747(3) 0.6030(9) 0.0230(8) Uani 1 1 d . . .
N10 N 0.8837(2) 0.8443(2) 0.7017(8) 0.0248(7) Uani 1 1 d . . .
C11 C 1.0216(3) 0.5977(3) 0.3696(9) 0.0277(8) Uani 1 1 d . . .
H11 H 1.0579 0.5505 0.2883 0.033 Uiso 1 1 calc R . .
C12 C 0.7467(3) 0.6411(3) 0.9047(10) 0.0310(9) Uani 1 1 d . . .
H12A H 0.7260 0.6573 1.1340 0.047 Uiso 1 1 calc R . .
H12B H 0.7765 0.5848 0.9105 0.047 Uiso 1 1 calc R . .
H12C H 0.6883 0.6408 0.7545 0.047 Uiso 1 1 calc R . .
C13 C 0.8674(3) 0.9365(3) 0.7592(11) 0.0350(10) Uani 1 1 d . . .
H13A H 0.7996 0.9518 0.6869 0.053 Uiso 1 1 calc R . .
H13B H 0.9164 0.9687 0.6275 0.053 Uiso 1 1 calc R . .
H13C H 0.8755 0.9492 1.0008 0.053 Uiso 1 1 calc R . .
H2 H 1.116(4) 0.696(4) 0.252(17) 0.060(16) Uiso 1 1 d . . .
 
loop_
 _atom_site_aniso_label
 _atom_site_aniso_U_11
 _atom_site_aniso_U_22
 _atom_site_aniso_U_33
 _atom_site_aniso_U_23
 _atom_site_aniso_U_13
 _atom_site_aniso_U_12
C1 0.0186(14) 0.0286(19) 0.0199(15) 0.0020(14) 0.0002(12) 0.0003(14)
O2 0.0252(13) 0.0441(18) 0.0364(15) -0.0029(14) 0.0083(12) 0.0051(12)
O3 0.0270(14) 0.0316(16) 0.0353(15) 0.0056(12) 0.0019(11) -0.0037(11)
N4 0.0207(14) 0.0313(17) 0.0224(14) -0.0004(14) 0.0009(12) 0.0003(13)
N5 0.0176(12) 0.0320(17) 0.0244(14) 0.0010(13) 0.0010(11) -0.0029(13)
C6 0.0186(14) 0.034(2) 0.0224(17) 0.0012(15) -0.0012(13) 0.0026(15)
N7 0.0229(15) 0.0297(18) 0.0279(15) 0.0000(14) -0.0008(12) -0.0008(13)
C8 0.0196(15) 0.032(2) 0.0203(15) -0.0009(15) -0.0024(14) 0.0001(15)
C9 0.0170(14) 0.033(2) 0.0186(16) -0.0005(14) -0.0021(11) 0.0004(15)
N10 0.0216(14) 0.0278(17) 0.0249(15) -0.0017(12) 0.0000(11) 0.0025(12)
C11 0.0273(17) 0.029(2) 0.0270(17) -0.0006(16) -0.0011(14) 0.0039(15)
C12 0.0217(17) 0.042(2) 0.0289(17) 0.0047(17) 0.0016(15) -0.0081(16)
C13 0.037(2) 0.032(2) 0.036(2) -0.0007(18) 0.0021(17) 0.0057(18)
 
_geom_special_details
;
 All esds (except the esd in the dihedral angle between two l.s. planes)
 are estimated using the full covariance matrix.  The cell esds are taken
 into account individually in the estimation of esds in distances, angles
 and torsion angles; correlations between esds in cell parameters are only
 used when they are defined by crystal symmetry.  An approximate (isotropic)
 treatment of cell esds is used for estimating esds involving l.s. planes.
;
 
loop_
 _geom_bond_atom_site_label_1
 _geom_bond_atom_site_label_2
 _geom_bond_distance
 _geom_bond_site_symmetry_2
 _geom_bond_publ_flag
C1 C9 1.362(5) . ?
C1 N4 1.377(5) . ?
C1 C8 1.416(5) . ?
O2 C6 1.233(4) . ?
O3 C8 1.226(4) . ?
N4 C11 1.342(5) . ?
N4 H2 0.91(6) . ?
N5 C6 1.363(5) . ?
N5 C9 1.383(4) . ?
N5 C12 1.467(5) . ?
C6 N10 1.386(5) . ?
N7 C11 1.341(5) . ?
N7 C9 1.360(5) . ?
C8 N10 1.422(5) . ?
N10 C13 1.469(5) . ?
C11 H11 0.9300 . ?
C12 H12A 0.9600 . ?
C12 H12B 0.9600 . ?
C12 H12C 0.9600 . ?
C13 H13A 0.9600 . ?
C13 H13B 0.9600 . ?
C13 H13C 0.9600 . ?
 
loop_
 _geom_angle_atom_site_label_1
 _geom_angle_atom_site_label_2
 _geom_angle_atom_site_label_3
 _geom_angle
 _geom_angle_site_symmetry_1
 _geom_angle_site_symmetry_3
 _geom_angle_publ_flag
C9 C1 N4 104.8(3) . . ?
C9 C1 C8 123.6(3) . . ?
N4 C1 C8 131.6(3) . . ?
C11 N4 C1 106.5(3) . . ?
C11 N4 H2 126(4) . . ?
C1 N4 H2 127(4) . . ?
C6 N5 C9 118.7(3) . . ?
C6 N5 C12 120.8(3) . . ?
C9 N5 C12 120.5(3) . . ?
O2 C6 N5 121.8(3) . . ?
O2 C6 N10 119.6(4) . . ?
N5 C6 N10 118.5(3) . . ?
C11 N7 C9 102.5(3) . . ?
O3 C8 C1 127.5(3) . . ?
O3 C8 N10 121.3(3) . . ?
C1 C8 N10 111.2(3) . . ?
N7 C9 C1 112.8(3) . . ?
N7 C9 N5 125.3(3) . . ?
C1 C9 N5 121.9(4) . . ?
C6 N10 C8 126.1(3) . . ?
C6 N10 C13 117.2(3) . . ?
C8 N10 C13 116.7(3) . . ?
N7 C11 N4 113.4(3) . . ?
N7 C11 H11 123.3 . . ?
N4 C11 H11 123.3 . . ?
N5 C12 H12A 109.5 . . ?
N5 C12 H12B 109.5 . . ?
H12A C12 H12B 109.5 . . ?
N5 C12 H12C 109.5 . . ?
H12A C12 H12C 109.5 . . ?
H12B C12 H12C 109.5 . . ?
N10 C13 H13A 109.5 . . ?
N10 C13 H13B 109.5 . . ?
H13A C13 H13B 109.5 . . ?
N10 C13 H13C 109.5 . . ?
H13A C13 H13C 109.5 . . ?
H13B C13 H13C 109.5 . . ?
 
_diffrn_measured_fraction_theta_max    0.998
_diffrn_reflns_theta_full              29.34
_diffrn_measured_fraction_theta_full   0.998
_refine_diff_density_max    0.311
_refine_diff_density_min   -0.317
_refine_diff_density_rms    0.081
